# Supplementary material for: LXRβ is required for glucocorticoid-induced hyperglycemia and hepatosteatosis in mice
Source: JCI journal article supplement (doi:10.1172/jci41681), 2010-12-01
Supplement: sd1 [file 1]

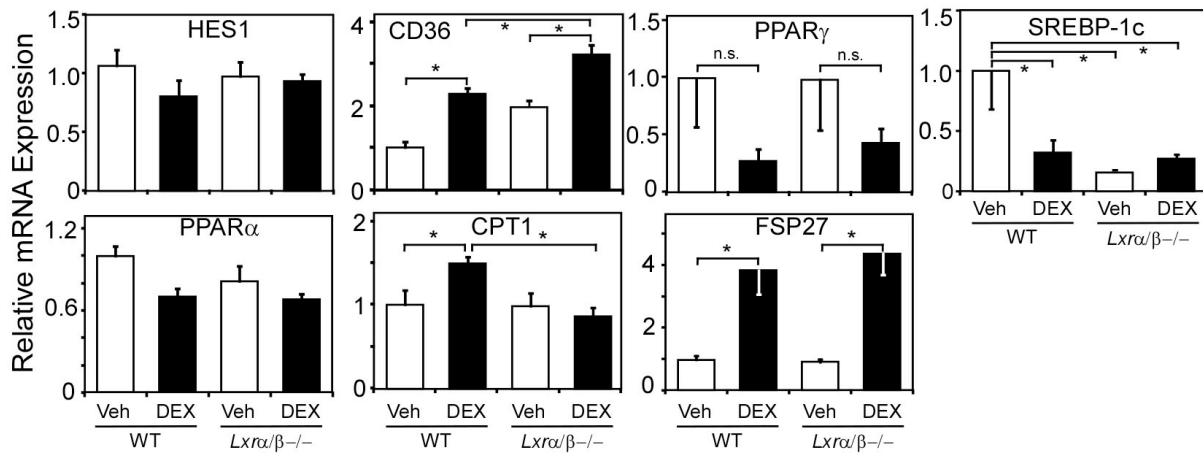

**Supplementary Figure 2: QPCR expression analysis of genes known to be involved in hepatic steatosis.** Liver RNA was extracted from WT and *Lxra/β-/-* mice treated with DEX (2.5 mg/kg b.i.d.) for five days, reverse-transcribed and real-time QPCR was performed using SYBR Green I chemistry. CD36, fatty acid translocase; CPT-1, carnitine palmitoyl-transferase I; FSP27, fat specific protein; HES1, hairy and enhancer of split 1. (Avg $\pm$ SEM,  $n=4-6$ ). \* $P<0.05$  by ANOVA and Student-Newman-Keuls, n.s., not statistically significant.

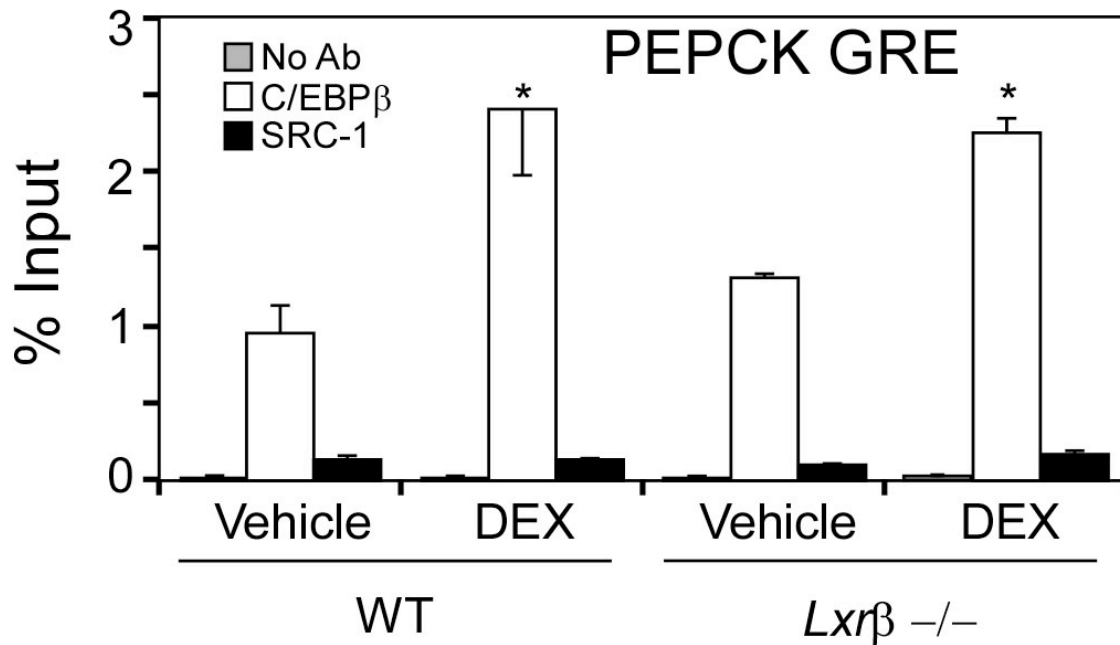

**Supplementary Figure 3: Recruitment of C/EBP $\beta$  and SRC-1 to the PEPCK promoter is similar in WT and *Lxr* $\beta$ -/- mice.** Chromatin immunoprecipitation of GR protein from mice perfused with vehicle or 10 nM DEX through the portal vein for 30 min. Chromatin was pooled from 2 mice per treatment and results are expressed relative to % input. Error bars represent PCR amplification variability (Avg $\pm$ SD,  $n=3$ ). \* $P<0.05$  (Student's t-test, relative to vehicle control of same genotype).

**Table S1: Average Change in Body Weight after DEX Treatment as a Function of Dosing Route and Length of Treatment**

| Treatment Regimen | s.c. injection<br>DEX<br>5 day treatment |                | s.c. injection<br>DEX-21-Acetate<br>7 day treatment |                         | i.p. injection<br>DEX<br>14 day treatment |                          |
|-------------------|------------------------------------------|----------------|-----------------------------------------------------|-------------------------|-------------------------------------------|--------------------------|
|                   | (g)                                      | (% of initial) | (g)                                                 | (% of initial)          | (g)                                       | (% of initial)           |
| <i>WT</i>         | <i>n</i> =8-9                            |                | <i>n</i> =12-14                                     |                         | <i>n</i> =4-5                             |                          |
| Veh               | -0.7 ± 0.6                               | -1.3 ± 1.3     | -2.0 ± 0.4                                          | -5.4 ± 1.1              | -0.3 ± 0.6                                | -0.5 ± 2                 |
| DEX               | 0.2 ± 0.5                                | 1.2 ± 1.6      | -3.4 ± 0.6 <sup>A</sup>                             | -8.4 ± 1.2 <sup>B</sup> | -2.4 ± 0.9                                | -6.8 ± 2.3 <sup>B</sup>  |
| <i>Lxrα/β-/-</i>  | <i>n</i> =11-15                          |                | <i>n</i> =15                                        |                         | <i>n</i> =6                               |                          |
| Veh               | 0.2 ± 0.3                                | 0.9 ± 1.0      | -0.2 ± 0.4                                          | -0.4 ± 1.3              | -0.3 ± 1.0                                | -0.4 ± 3.5               |
| DEX               | -0.4 ± 0.2                               | -1.2 ± 0.8     | -1.5 ± 0.5 <sup>A</sup>                             | -4.5 ± 1.3 <sup>*</sup> | -0.6 ± 0.5                                | -1.9 ± 1.6               |
| <i>Lxrα-/-</i>    |                                          |                | <i>n</i> =6                                         |                         | <i>n</i> =5                               |                          |
| Veh               |                                          |                | -0.5 ± 0.2                                          | -1.9 ± 0.6              | -3.0 ± 1.4                                | -7.6 ± 3.4               |
| DEX               |                                          |                | 0.3 ± 0.6                                           | 0.7 ± 2.2               | -0.02 ± 1.1                               | 0.1 ± 2.6                |
| <i>Lxrβ-/-</i>    |                                          |                | <i>n</i> =6                                         |                         | <i>n</i> =4-5                             |                          |
| Veh               |                                          |                | -0.03 ± 0.5                                         | -0.1 ± 1.7              | 0.5 ± 0.4                                 | 2.1 ± 1.3                |
| DEX               |                                          |                | -0.9 ± 0.5                                          | -3.3 ± 1.8              | -2.9 ± 0.6 <sup>*</sup>                   | -10.2 ± 1.9 <sup>*</sup> |

Data shown represent the Avg±SEM

<sup>\*</sup>Significantly different from Veh of same genotype P<0.05 (Student's t-test)

<sup>A</sup>P=0.05; <sup>B</sup>P=0.07

**Table S2: QPCR primer sequences**

| <b>Gene Name</b>                  | <b>Abbrev.</b> | <b>Accession#</b> | <b>Forward and Reverse Primers</b>                       |
|-----------------------------------|----------------|-------------------|----------------------------------------------------------|
| CD36 (fatty acid translocase)     | CD36           | NM_007643.3       | 5'ggaactgtgggctcattgc3' 5'catgagaatcctccaacac3'          |
| Carnitine Palmitoyltransferase I  | CPT1           | NM_013495.1       | 5'tgagtggcgtcctctttgg3' 5'cagcgagtagcgcatagtca3'         |
| Cyclophilin B                     | cyclophilin    | NM_011149.2       | 5'ggagatggcacaggaggaa3' 5'gccctagtgttcagctt3'            |
| Fat specific gene 27 (CIDEC)      | FSP27          | NM_178373.3       | 5'tggcaaaagataccatgttcag3' 5'gctctgggaaaggctagct3'       |
| Forkhead box O1                   | FOXO1          | NM_019739.2       | 5'tcatggatggagataccttga3' 5'cttgacactgtgtgggaagctt3'     |
| Glucose-6-phosphatase             | G6Pc           | NM_008061.3       | 5'gtggcagtggtcggagact3' 5'acggcggtgtccaac3'              |
| Glucocorticoid Receptor           | GR             | NM_008173.3       | 5'catacatgcaggtagagtattctt3' 5'gcaagtggaaacctctatgc3'    |
| Hairy and enhancer of split 1     | HES1           | NM_008235.2       | 5'aaccaagacggcctctga3' 5'ccctgcctcttctccat3'             |
| Phosphoenolpyruvate carboxykinase | PEPCK          | NM_011044.2       | 5'caccatcacctcctggaaga3' 5'gggtgcagaatctcagttg3'         |
| PPARalpha                         | PPAR $\alpha$  | NM_011144.3       | 5'acaaggcctcagggtacca3' 5'gccgaaagaagccttacag3'          |
| PPARgamma                         | PPAR $\gamma$  | NM_011146.2       | 5'caagaataccaaagtgcgatcaa3' 5'agctgggtctttcagaataataag3' |
| PPAR-gamma coactivator 1 $\alpha$ | PGC1 $\alpha$  | NM_008904.1       | 5'tgagagaccgtttgaagttt3' 5'cgtaggtgatgaaccatagc3'        |
| Tyrosine aminotransferase         | TAT            | NM_146214.2       | 5'tctggagccatgtaccttatgg3' 5'tccacgtcattctcaattctg3'     |
| SREBP-1c                          | SREBP1c        | NM_011480.2       | 5'ggagccatggattgcacatt3' 5'ggccgggaagtcactgt3'           |
